# Supplementary material for: Brown-fat-mediated tumour suppression by cold-altered global metabolism
Source: PubMed Central journal article supplement (PMC9365697; doi:10.1038/s41586-022-05030-3), 2022-08-03

---

**Supplementary information**

---

**Brown-fat-mediated tumour suppression by cold-altered global metabolism**

---

In the format provided by the  
authors and unedited

Supplementary Figure 1-Extended Data Fig. 1c, d:  
Gating strategies used for Extended Data Fig. 1c, d.  
FSC/SSC gate for the elimination of debris followed by a gate for GFP<sup>+</sup> tumor cells isolation.  
Further, PI-Width/PI-Area was used for doublet exclusion for PI histograms.

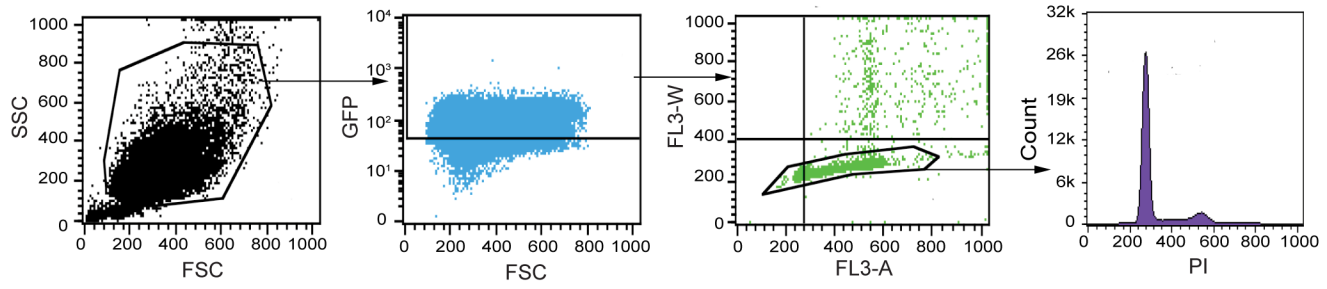

# Supplementary Figure 2-Fig.4e:

Raw data of gels for immunoblots.

Whole gel images. Full scans of immunoblots in Fig.4e.

Boxes imply area shown in the Figure.

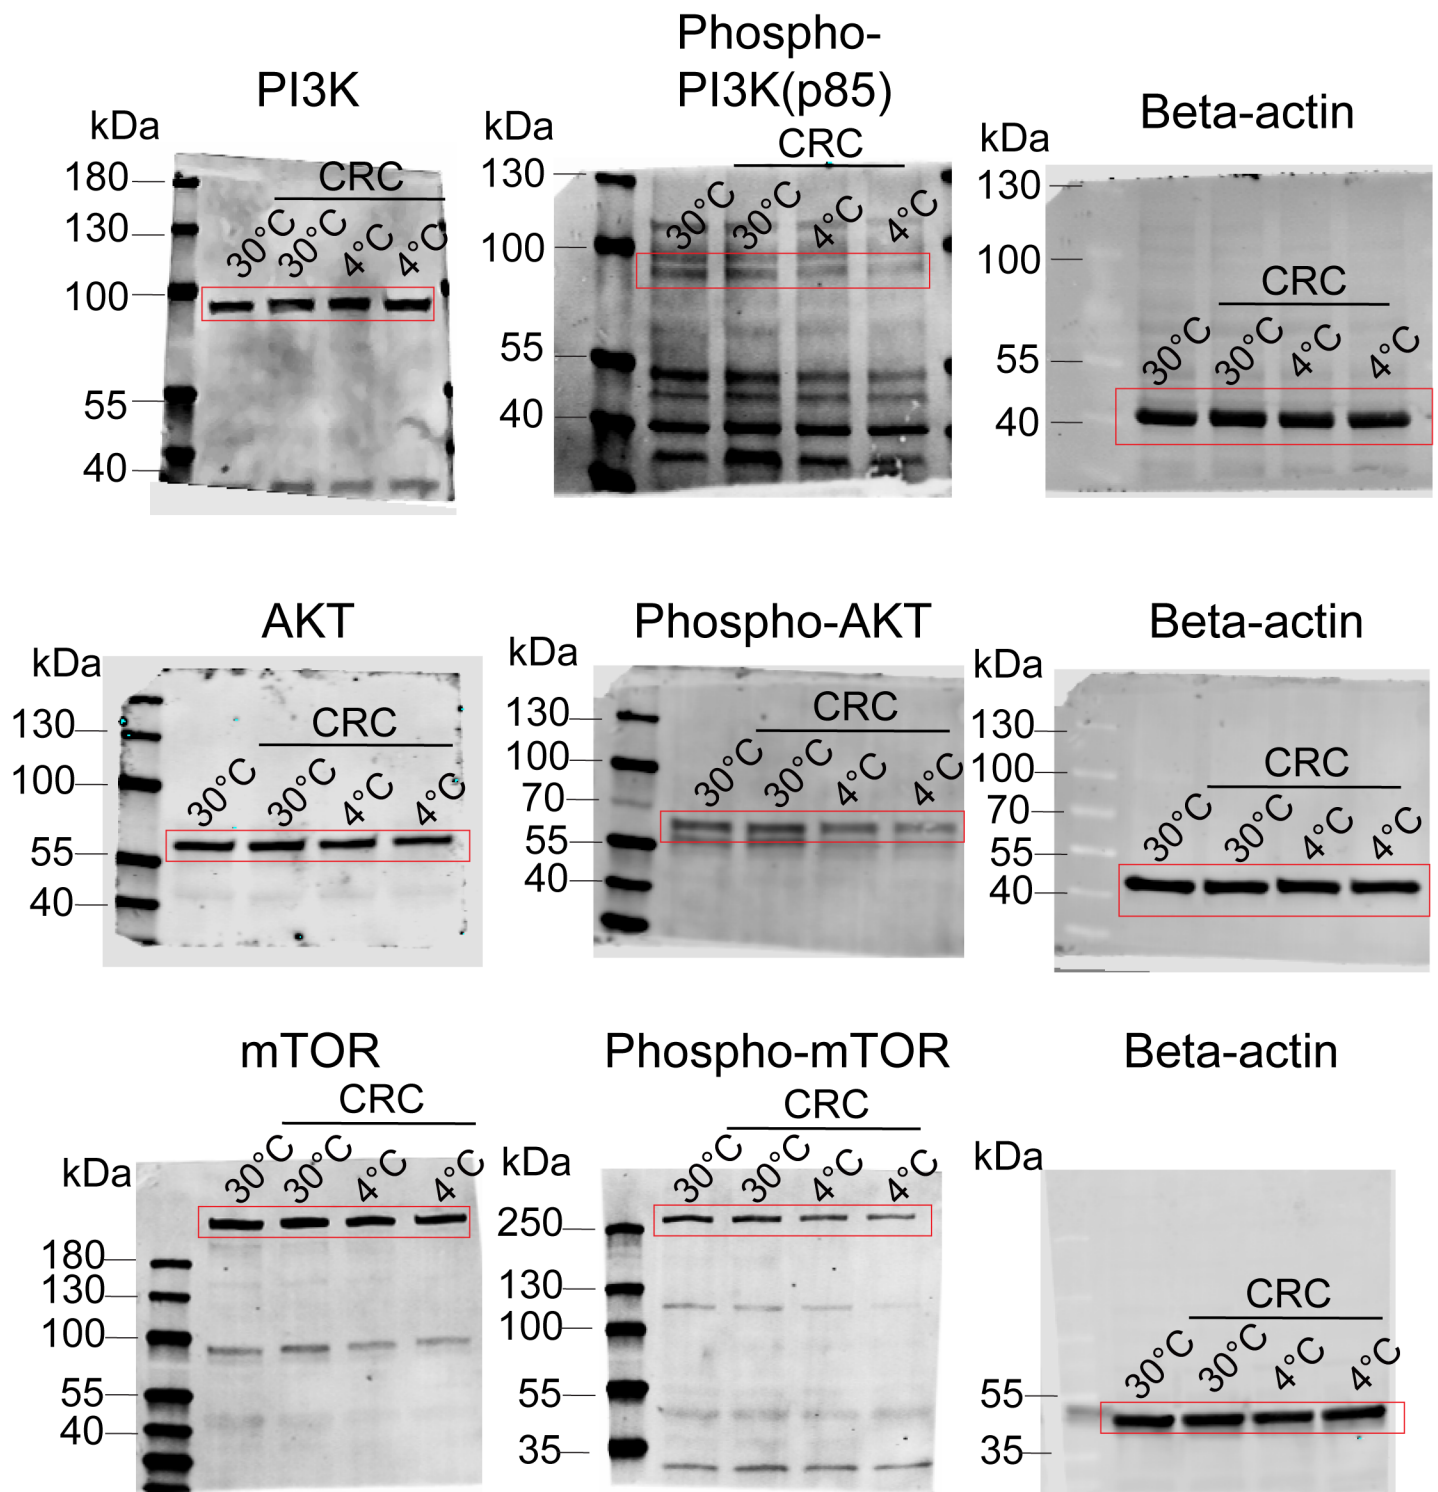

# Supplementary Figure 2-Fig.5c:

Raw data of gels for immunoblots.

Whole gel images. Full scans of immunoblots in Fig.5c

Boxes imply area shown in the Figure.

## PI3K

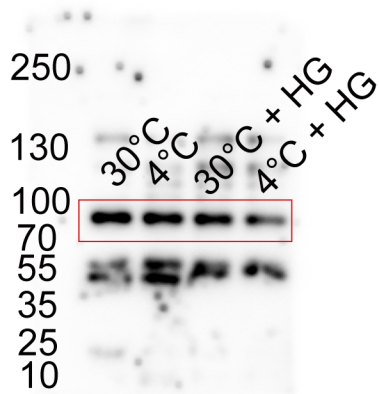

## Phospho-PI3K(p85)

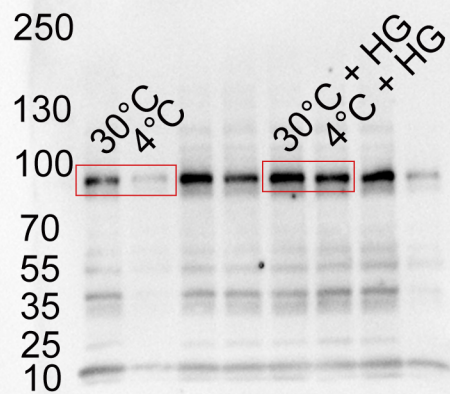

## AKT

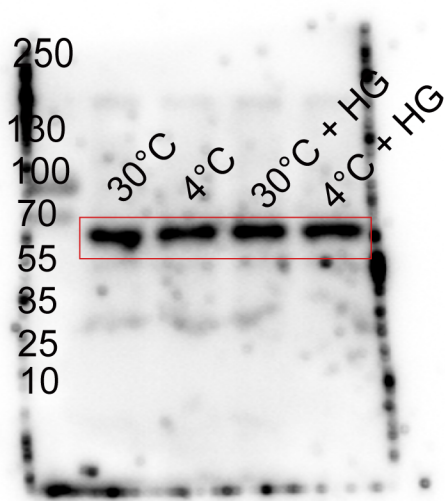

## Phospho-AKT

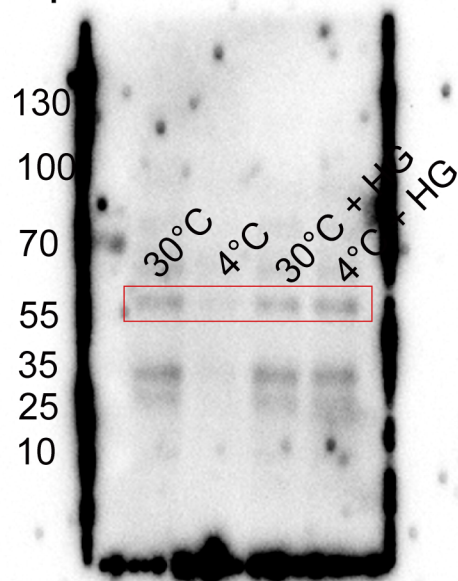

## GLUT1

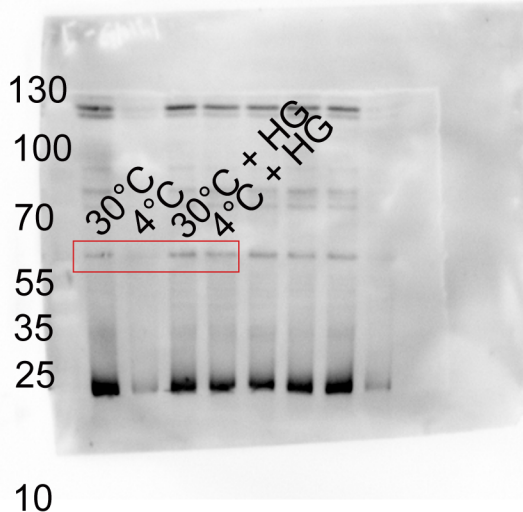

## GAPDH

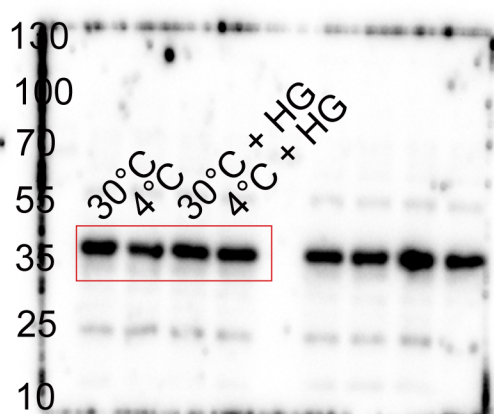

# Supplementary Figure 2-Extended Data Fig 5I:

Raw data of gels for immunoblots.

Whole gel images. Full scans of immunoblots in Extended Data Fig 5I.

Boxes imply area shown in the Figure.

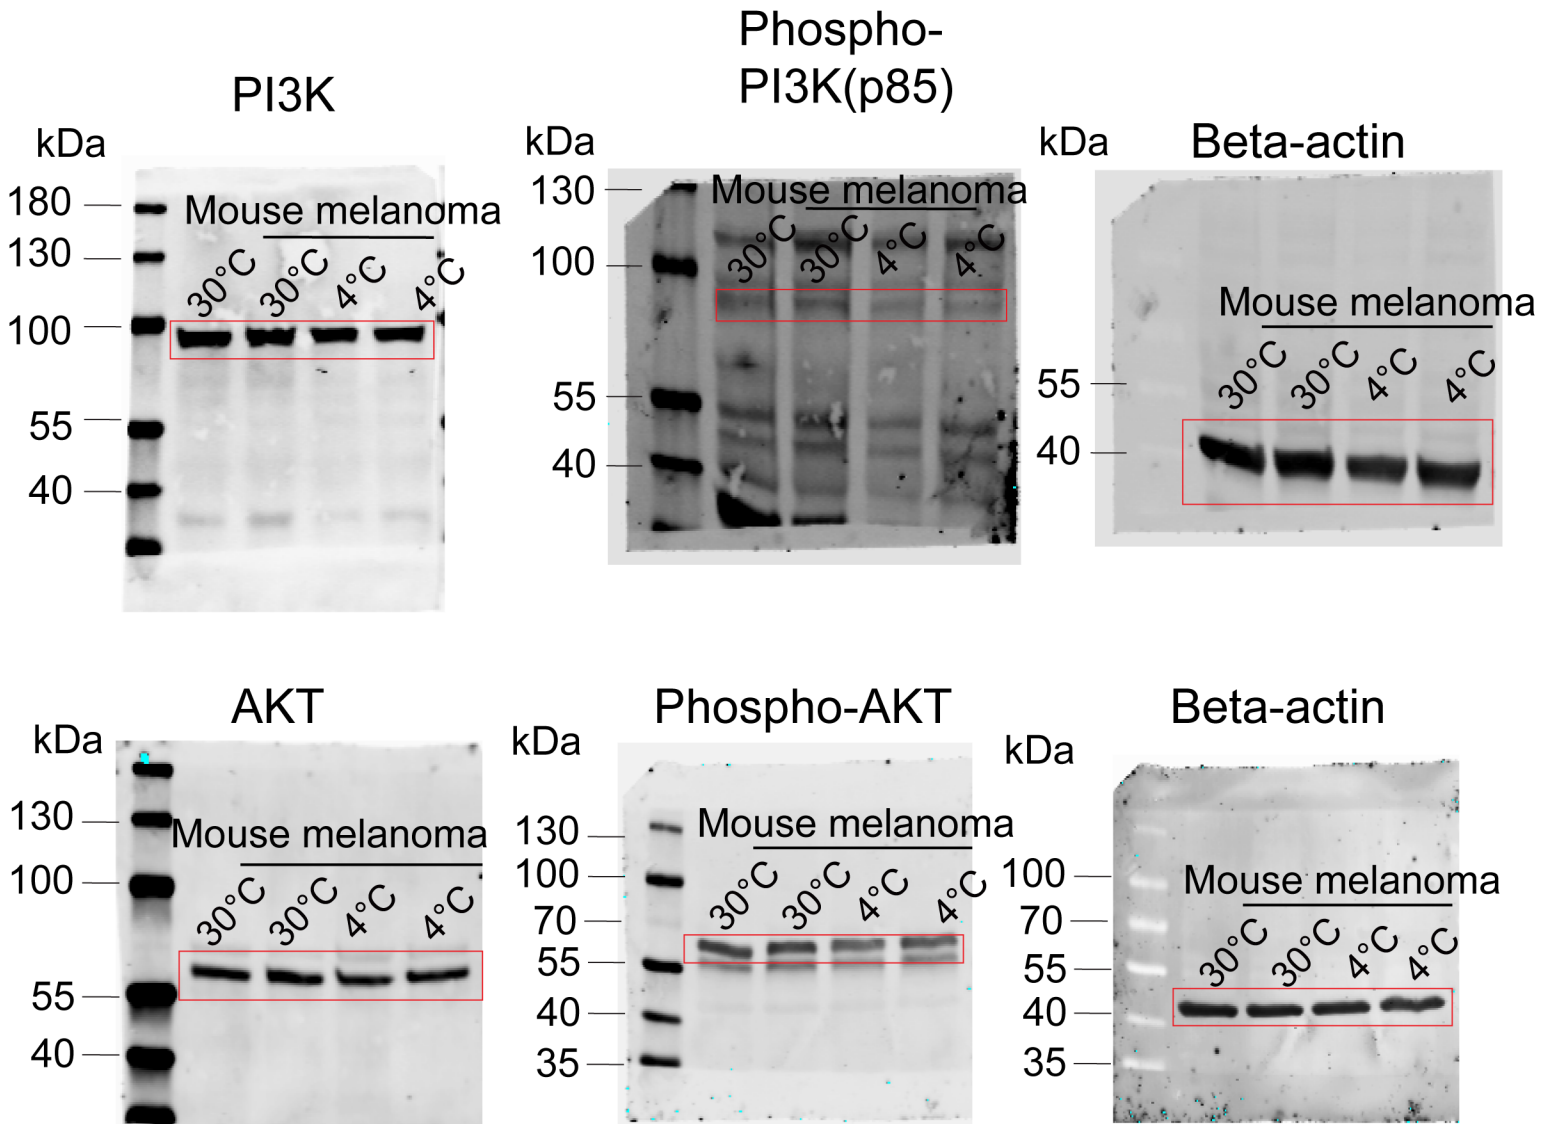

Supplement: 41586_2022_5030_MOESM1_ESM.pdf [file 41586_2022_5030_MOESM1_ESM.pdf]
